# Supplementary material
Source: PubMed Central journal article supplement (PMC6648918)
Supplement: ao8b03061_si_001.pdf [file ao8b03061_si_001.pdf]

## LDH-Cellulose Hybrid Beads:

### A Novel Catalyst for Topochemical Grafting of Pulp Fibers

LijiSobhana S. Sobhanadhas<sup>1</sup>, Lokesh Kesavan<sup>2</sup>, Mika Lastusaari<sup>2</sup>, Pedro Fardim<sup>1,3\*</sup>

<sup>1</sup>Laboratory of Fibre and Cellulose Technology, Åbo Akademi University, Porthansgatan 3, FI-20500, Åbo, Finland

<sup>2</sup>Laboratory of Materials Chemistry and Chemical Analysis, Turku University Centre for Materials and Surfaces (MatSurf), University of Turku, Vatselankatu 2, FI-20014 Turku, Finland

<sup>3</sup>Department of Chemical Engineering, KU Leuven, Celestijnenlaan 200F bus 2424, B-3001 Leuven, Belgium

Corresponding author email address: pfardim@abo.fi

Powdered LDH catalyst

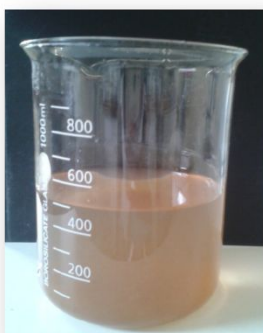

Separation of the catalyst is difficult

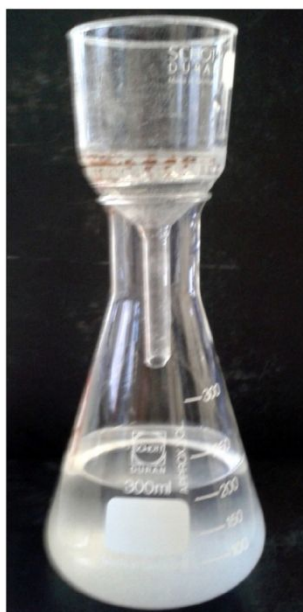

LDH Catalyst supported on Beads

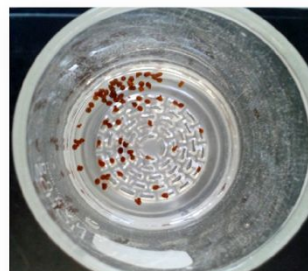

Catalyst

Separation of the catalyst is easier by simple filtration

Fibers

**Figure S1:** Visualization in understanding the difference between homogeneous and heterogeneous catalysis conditions

| Parameters                   | NiFe LDH | HB    |
|------------------------------|----------|-------|
| a (Å) (metal-metal distance) | 3.08     | 3.02  |
| c (Å)                        | 23.192   | 24.78 |
| Basal spacing, (Å)           | 7.735    | 8.10  |

**Table S1:** Crystallographic parameters of LDH particles and hybrid beads (HB)
